# Supplementary material for: Early spatiotemporal-specific changes in intermediate signals are predictive of cytotoxic sensitivity to TNFα and co-treatments
Source: PubMed Central journal article supplement (PMC5341104; doi:10.1038/srep43541), 2017-03-08
Supplement: srep43541-s1.pdf [file srep43541-s1.pdf]

Supplementary Materials for

**Early spatiotemporal-specific changes in intermediate signals are predictive of cytotoxic sensitivity to TNF $\alpha$  and co-treatments**

**Lit-Hsin Loo\*, Nicola Michelle Bougen-Zhukov, Wei-Ling Cecilia Tan**

Bioinformatics Institute, Agency for Science, Technology and Research, 30 Biopolis Street, #07-01 Matrix, Singapore 138671, Singapore

\* Correspondence should be addressed to LHL: [loolh@bii.a-star.edu.sg](mailto:loolh@bii.a-star.edu.sg)

**Supplementary Figure S1-14, Table S1-3**

## Supplementary Materials

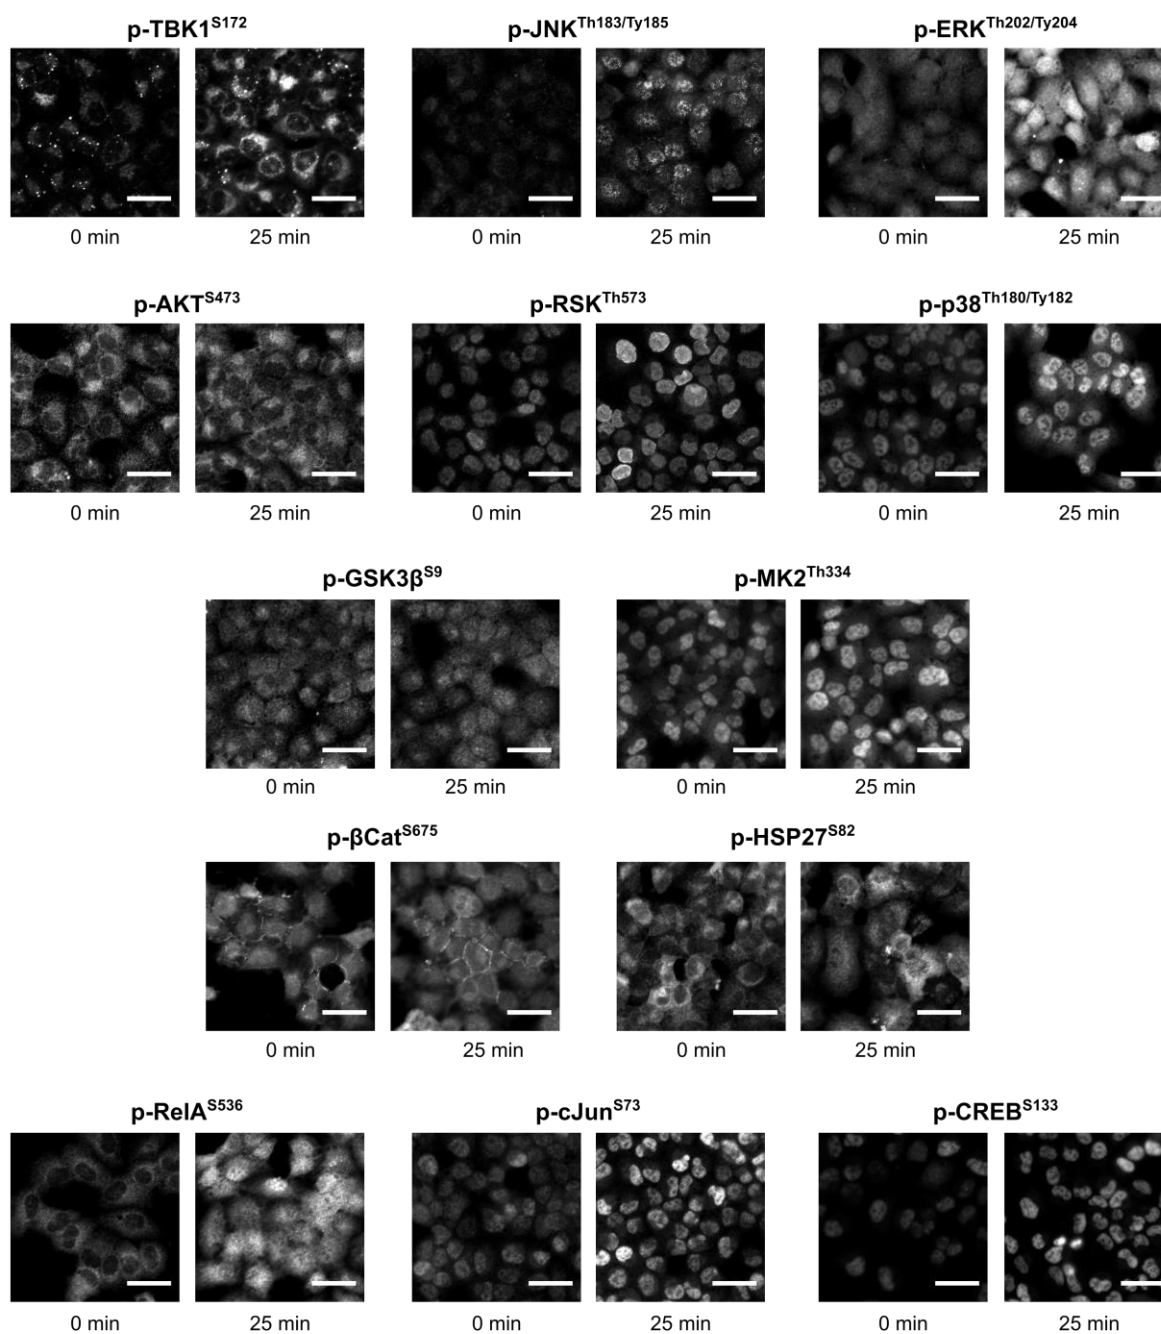

**Figure S1.** Examples of representative immunofluorescence images showing the staining of 13 intracellular signals in H460 cell lines treated with 0 or 25 min of TNF $\alpha$ . For each signal, the intensities of the images shown are scaled to the same display ranges (scale bars = 40  $\mu$ m).

## Supplementary Materials

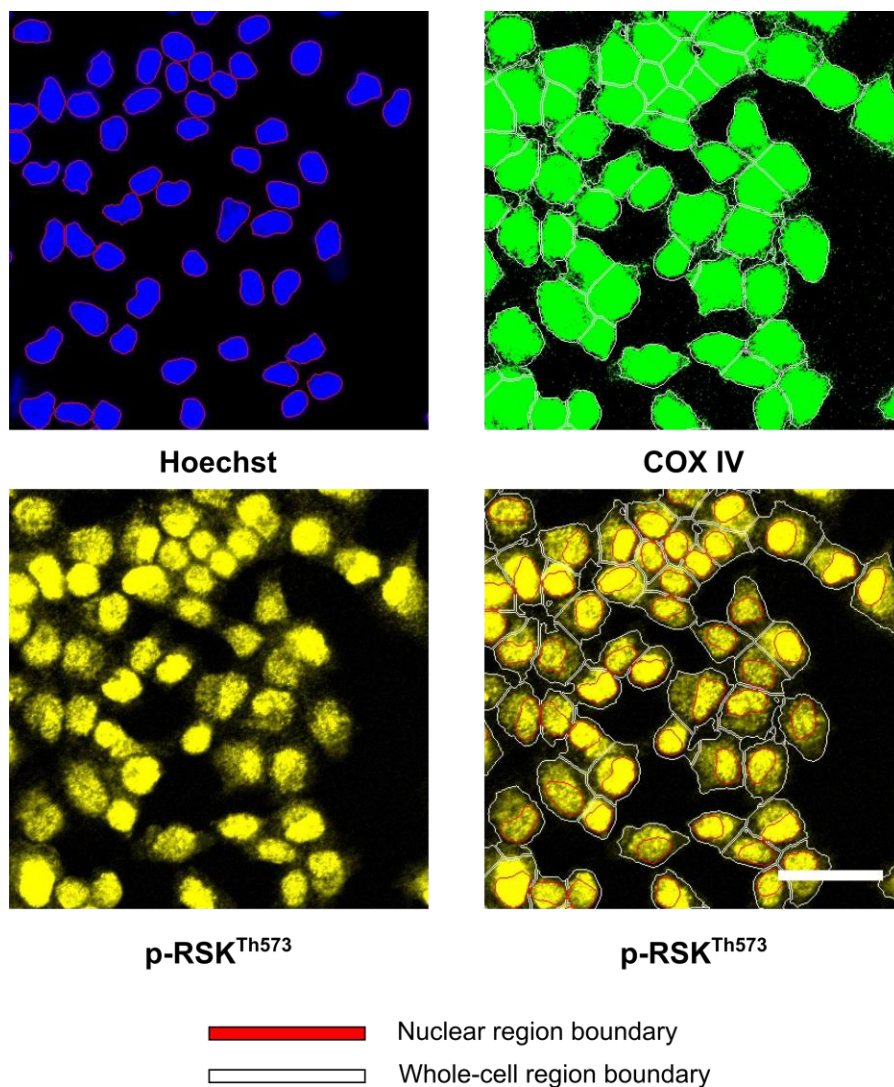

**Figure S2.** Examples of representative immunofluorescence images showing the automatically detected nuclear (red lines) and whole-cell (white lines) boundaries (scale bar = 40  $\mu\text{m}$ ). The whole-cell and nuclear regions were detected based on the COX-IV (green) and Hoechst (blue) staining, respectively. To avoid bias, the phospho-protein staining (yellow) was not used for segmentation.

## Supplementary Materials

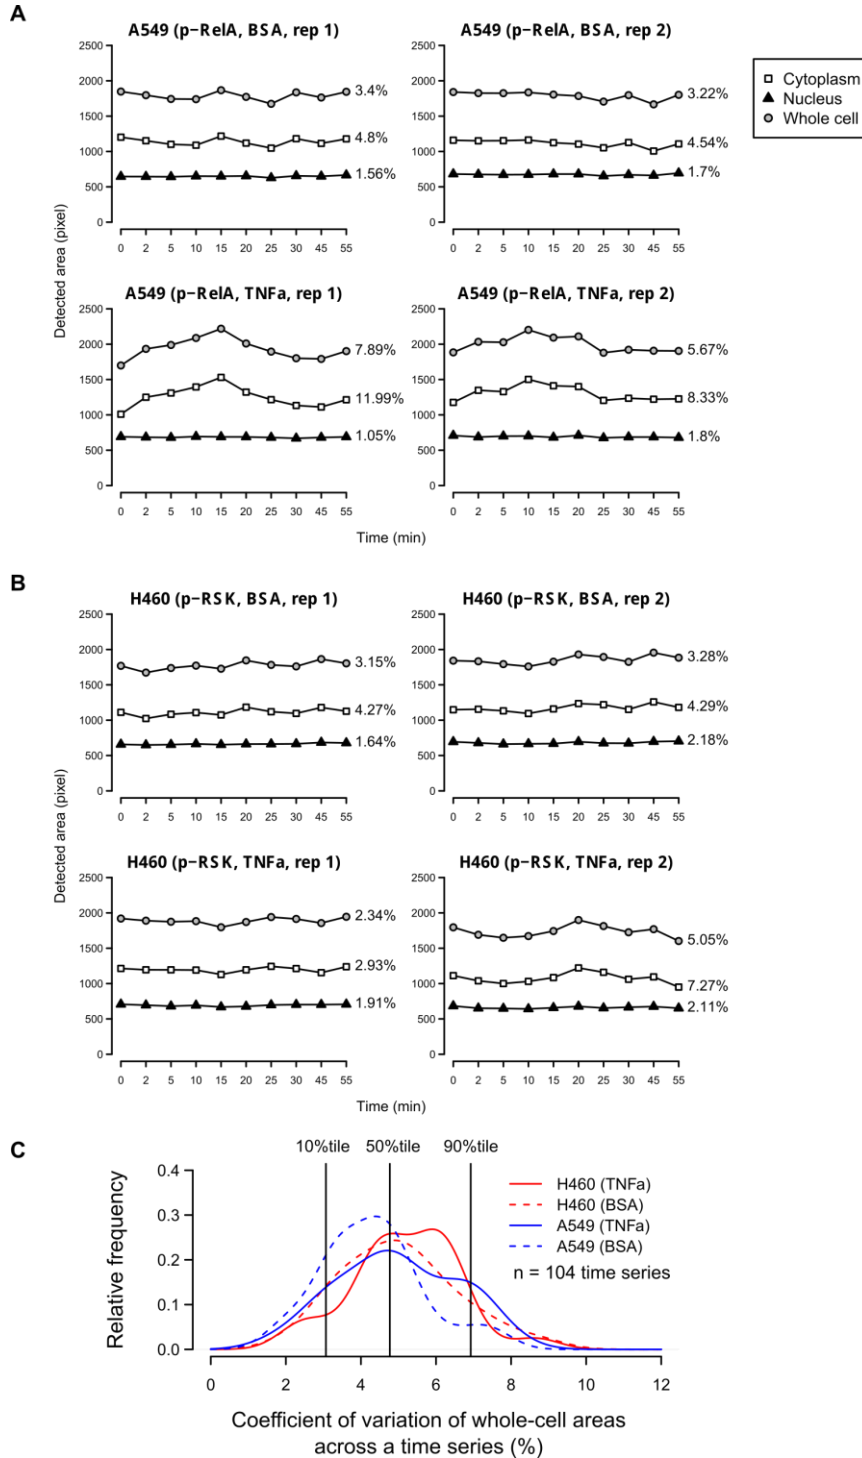

**Figure S3.** The areas of the automatically detected cytoplasmic, nuclear, and whole-cell regions of **A)** A549 cells stained with p-RelA<sup>S536</sup>, or **B)** H460 cells stained with p-RSK<sup>Th573</sup> across different time points (or wells) in our assays. The coefficient of variation (CV) of each time series is shown next to the series, rep = replicate. **C)** Probability distribution functions of the CV values for all the time series of A549 (blue) or H460 (red) cells. (Vertical black lines = percentiles of the CV values across all the time series).

## Supplementary Materials

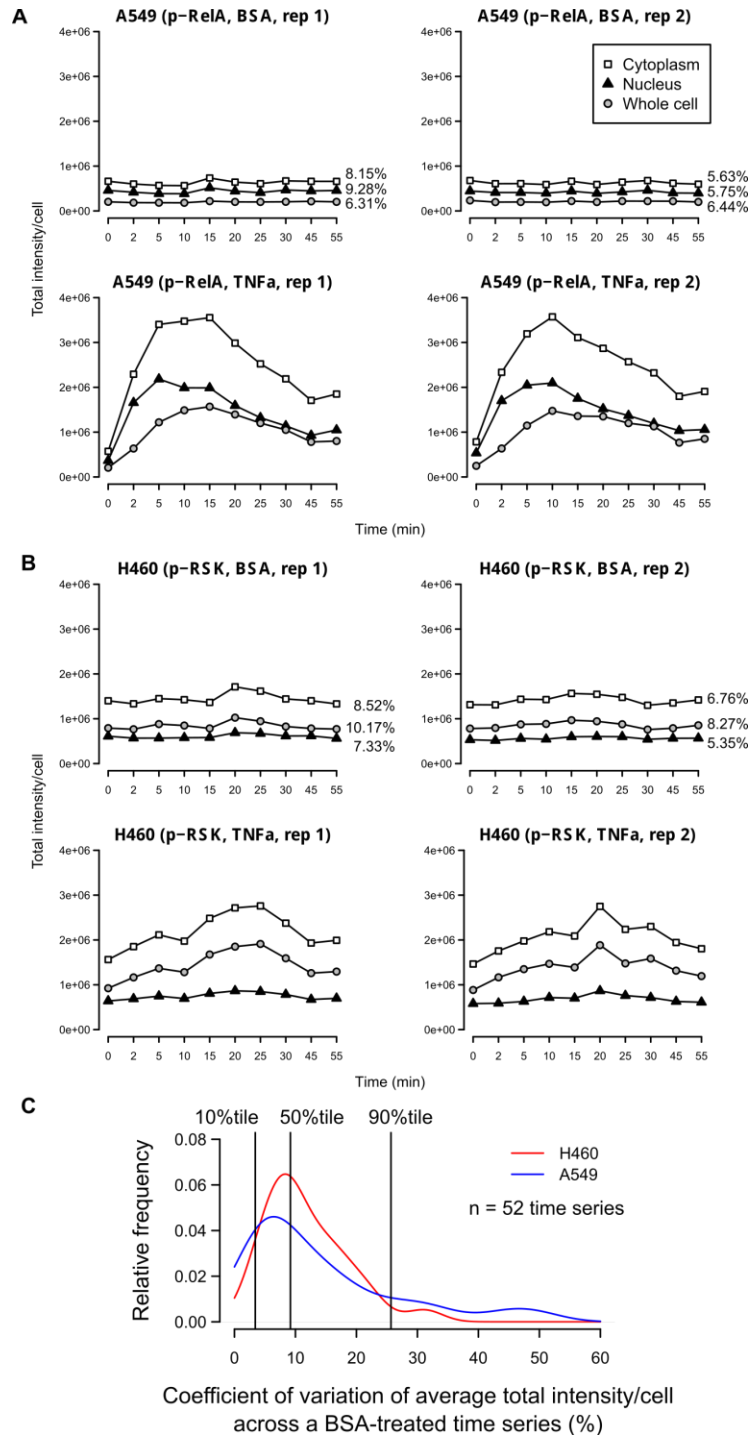

**Figure S4.** The raw fluorescence intensity levels of **A)** p-RelA<sup>S536</sup> staining in A549 cells, or **B)** p-RSK<sup>Th573</sup> staining in H460 cells treated with 0.1% BSA or 300 ng/mL of TNF $\alpha$  across different time points (or wells) in our assays. The coefficient of variation (CV) of each time series is shown next to the series, rep = replicate. **C)** Probability distribution functions of the CV values for all the time series of BSA-treated A549 (blue) or H460 (red) cells. (Vertical black lines = percentiles of the CV values across all the time series.)

## Supplementary Materials

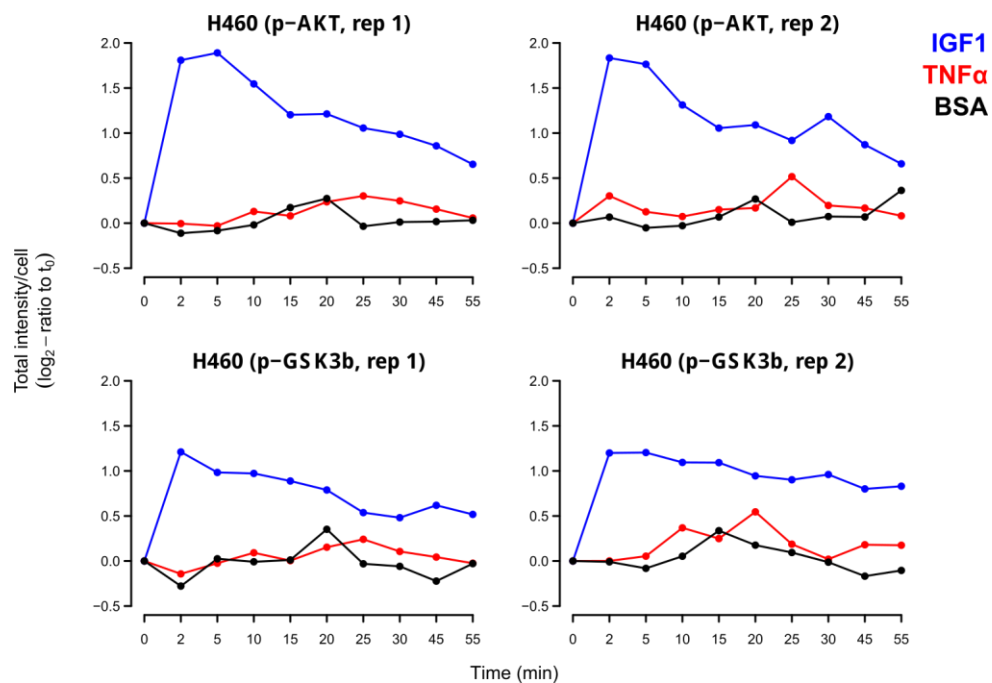

**Figure S5.** The normalized total intensity levels of p-AKT<sup>S473</sup> and p-GSK3b<sup>S9</sup> in H460 cells treated with 0.1% BSA (black), 300 ng/mL TNFα (red), or 300 ng/mL IGF1 (blue).

## Supplementary Materials

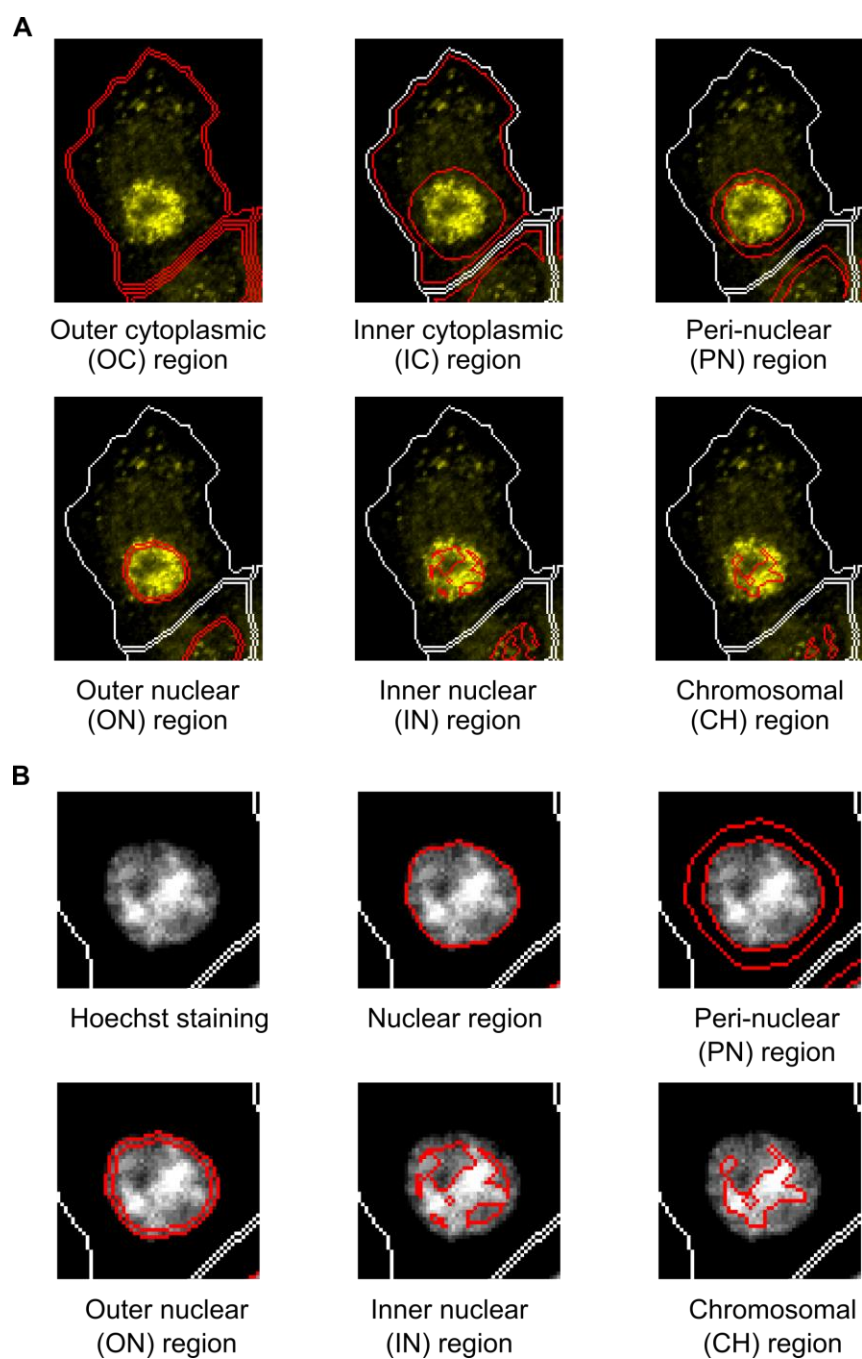

**Figure S6.** Examples of immunofluorescence images showing the different automatically detected subcellular regions (red boundaries) and whole-cell regions (white boundaries) overlaid with **A**) p-JNK<sup>Th183/Ty185</sup> (yellow) or **B**) Hoechst (white) staining. The whole-cell and nuclear regions were detected based on the COX-IV and Hoechst staining, respectively.

## Supplementary Materials

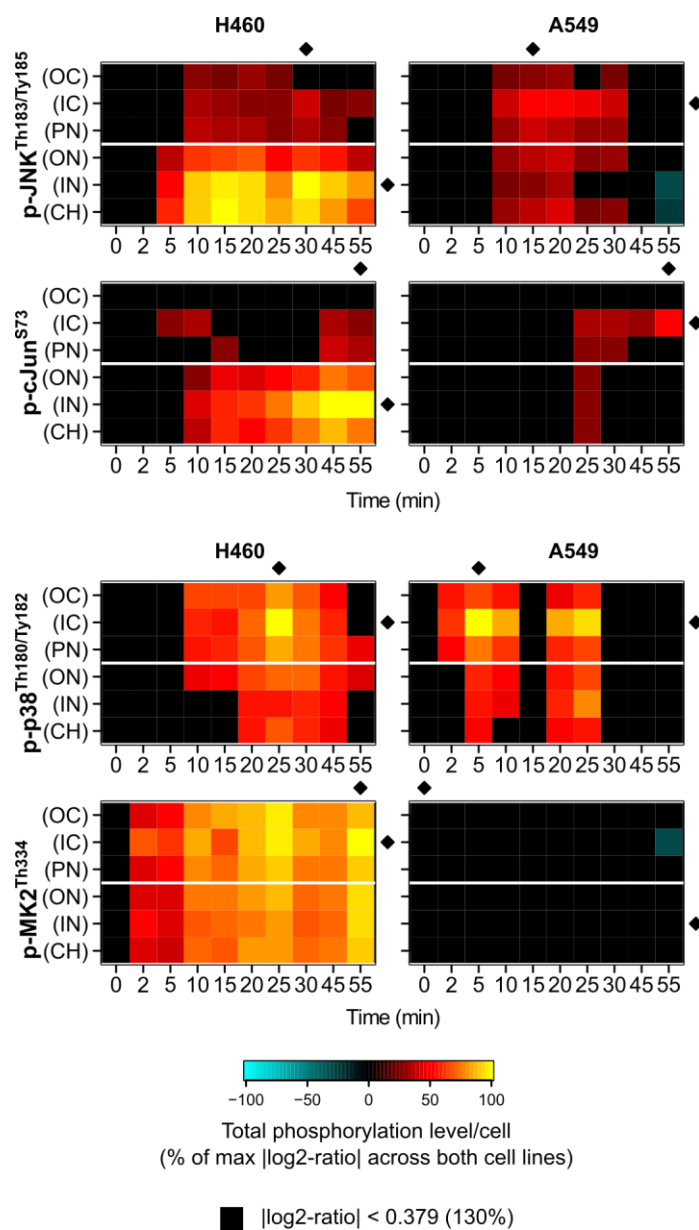

**Figure S7.** Heatmaps showing changes in the phosphorylation levels of two additional pairs of kinase-substrate signals at different subcellular regions in H460 and A549 cells treated with 300 ng/mL of TNF $\alpha$ . The values for all phosphorylation events are  $\log_2$  ratios of their corresponding values at time 0 (without TNF $\alpha$  treatment). For visualization only, the  $\log_2$  ratios for each signal are divided by their maximum absolute value across both cell lines in all regions (diamonds = subcellular regions or time points in which the maximum phosphorylation levels were detected).



## Supplementary Materials

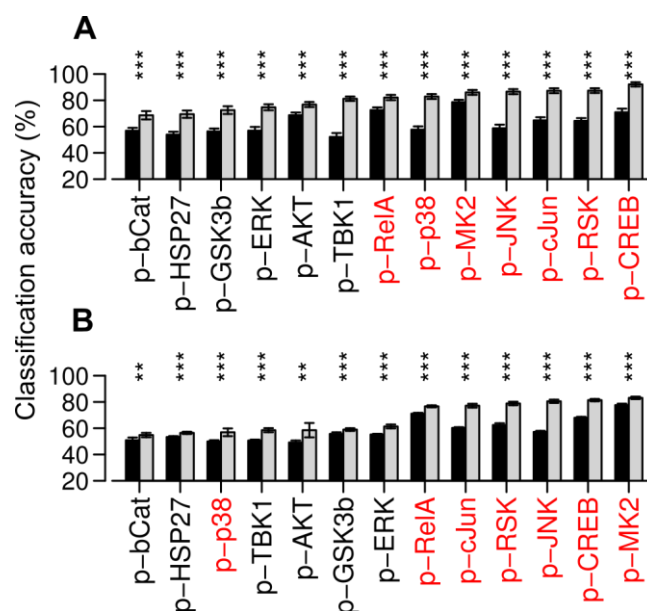

**Figure S8.** Mean balanced accuracy in classifying H460 and A549 cells using support vector machines based on the phosphorylation events of individual signals (red = signals selected for the second stage; \*\* =  $P < 0.01$ , \*\*\* =  $P < 0.001$ , two-sided t-test,  $n = 9$ ; error bars = standard deviations). The values were estimated using **A**) a radial-basis-function kernel for the SVM and 10-fold cross validation, and **B**) a linear kernel for the SVM and 3-fold cross validation.

## Supplementary Materials

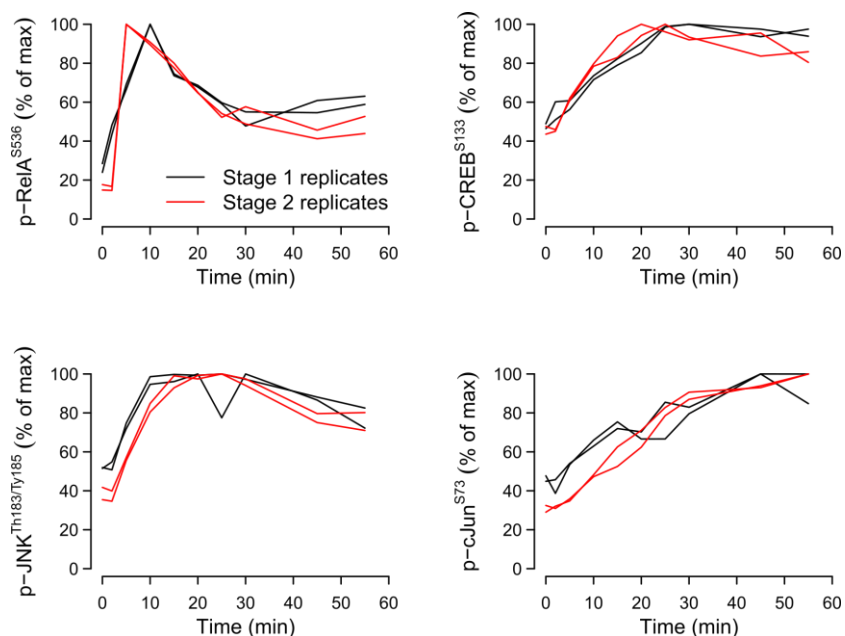

**Figure S9.** Examples of signaling responses curves obtained from H460 cells in the stages 1 and 2 experiments. Each experiment had two replicates, and each response curve was normalized by dividing all its values with the maximum value across all the time points.

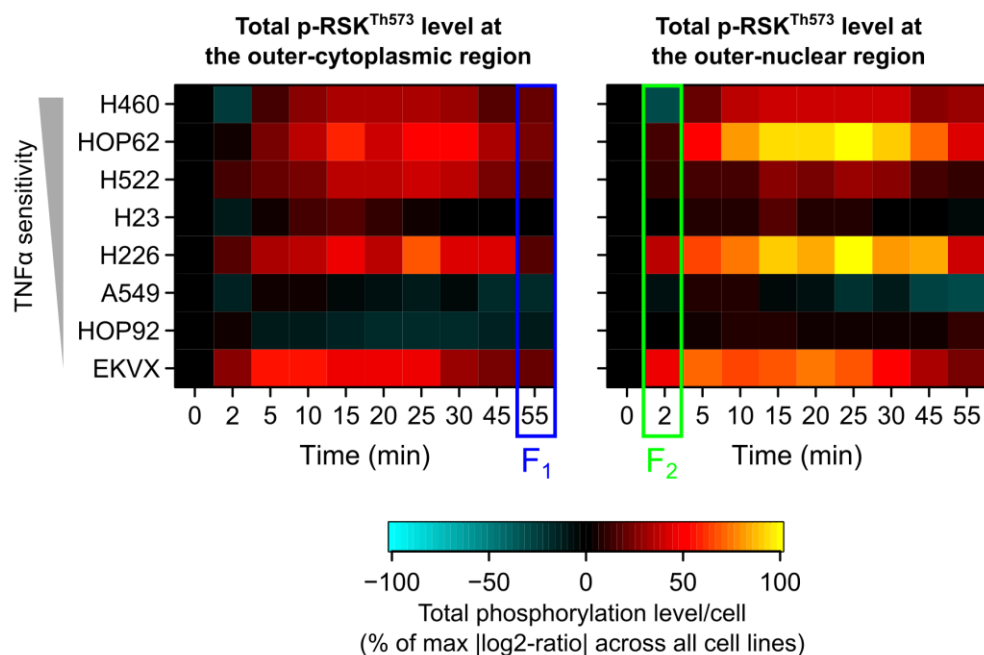

**Figure S10.** Heatmaps showing changes in the total phosphorylation levels of p-RSK<sup>Th573</sup> at two different subcellular regions in all eight cell lines treated with 300 ng/mL of TNF $\alpha$ . The values for all phosphorylation events are log<sub>2</sub> ratios of their corresponding values at time 0 (without TNF $\alpha$  treatment). For visualization only, the log<sub>2</sub> ratios are divided by the maximum absolute value across all cell lines.

## Supplementary Materials

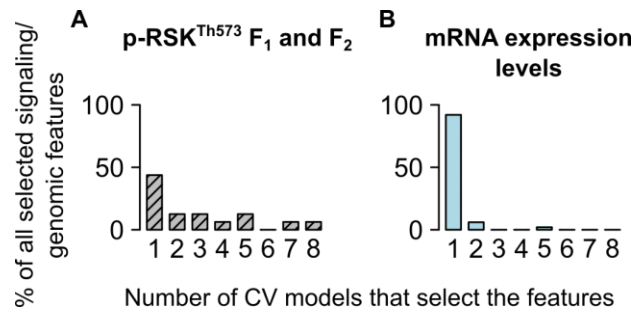

**Figure S11.** Distributions of the number of cross-validation (CV) models that commonly select a feature for models based on the **A)** p-RSK<sup>Th573</sup> features, or **B)** mRNA expression levels of the NSCLC cell lines.

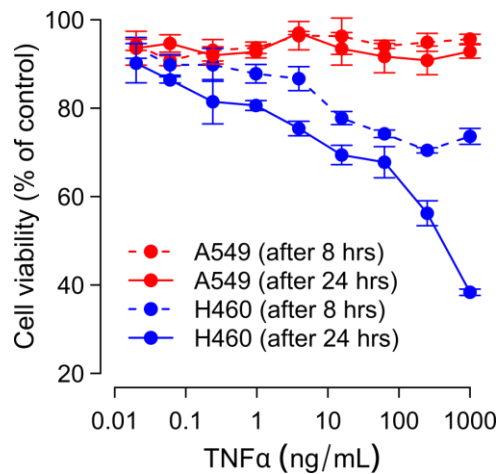

**Figure S12.** Dose response curves showing the percentages of viable A549 and H460 cells treated with different concentrations of TNF $\alpha$  for 8 or 24 hours (n=3, error bars=standard errors of the means). The values were obtained using the resazurin-based cell viability assay.

## Supplementary Materials

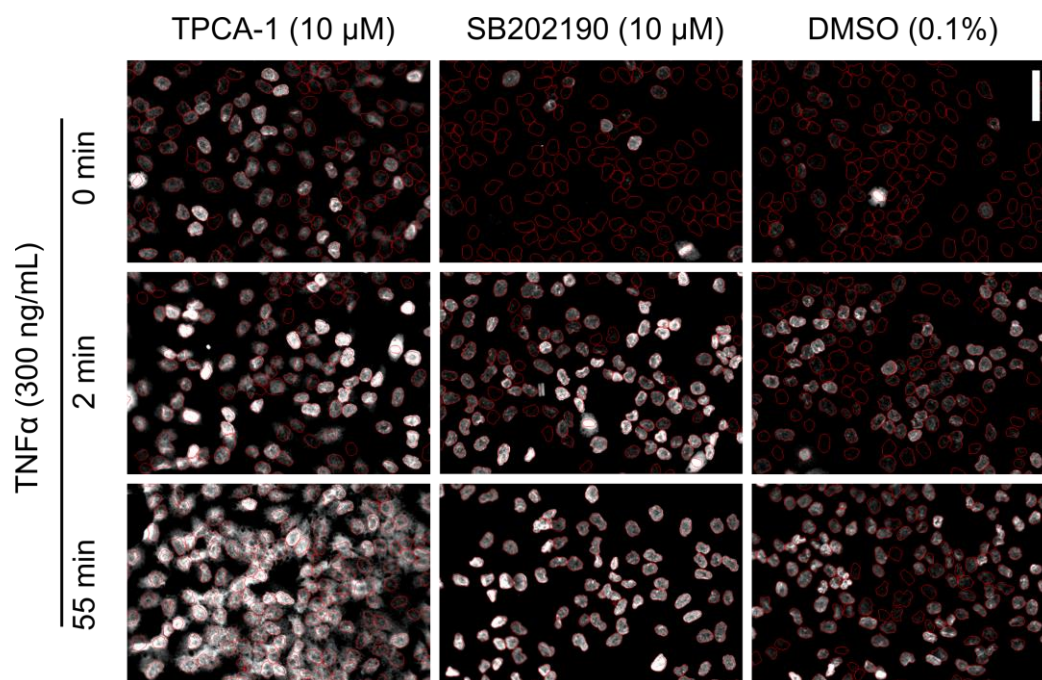

**Figure S13.** Immunofluorescence images showing the p-RSK<sup>Th573</sup> staining of H460 cells pre-treated with either DMSO, TPCA-1, or SB202190, and then co-treated with TNF $\alpha$  (red lines = automatically determined nuclear boundaries, scale bar = 50  $\mu$ m). All images have the same exposure times and display intensity ranges.

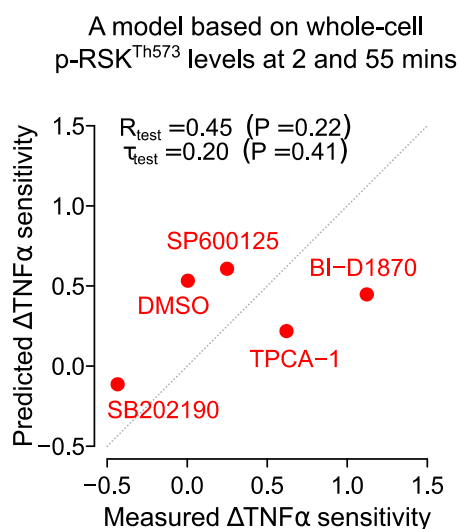

**Figure S14.** Scatter plot showing measured versus predicted  $\Delta$ TNF $\alpha$  sensitivity indices of H460 cells treated with four different kinase inhibitors. The predictions were made using a regression model based on whole-cell p-RSK<sup>Th573</sup> levels at 2 and 55 mins. (Dashed line = diagonal line, red = new test data that was not used to train the model,  $R_{\text{test}}$  = Pearson's correlation coefficient,  $\tau_{\text{test}}$  = Kendalls' correlation coefficient, P-values shown were obtained from significance tests that the correlations are larger than zero).

## Supplementary Materials

**Table S1. List of the thirteen candidate intracellular signals in our study.**

| <b>Protein (Symbol)</b>                                           | <b>Phospho site</b>            | <b>Relevance/ References</b>                                                                                                                                                                                                                            |
|-------------------------------------------------------------------|--------------------------------|---------------------------------------------------------------------------------------------------------------------------------------------------------------------------------------------------------------------------------------------------------|
| p65 subunit of nuclear factor- $\kappa$ B (p-RelA)                | Serine 536                     | TNF $\alpha$ and other inflammatory cytokines activate RelA, a subunit of NF- $\kappa$ B [1]. NF- $\kappa$ B attenuates TNF $\alpha$ -induced cell death [2] and upregulates the expression of many pro-survival genes [3].                             |
| c-Jun N terminal kinase (p-JNK)                                   | Threonine 183/<br>Tyrosine 185 | JNK is phosphorylated and activated in response to stress and TNF $\alpha$ treatment [4]. TNF $\alpha$ -induced JNK activation is associated with the initiation of apoptosis [5,6].                                                                    |
| Extracellular signal-regulated kinase (p-ERK)                     | Threonine 202/<br>Tyrosine 204 | ERK is phosphorylated in response to numerous external stimuli, including TNF $\alpha$ [7]. TNF $\alpha$ may inhibit ERK activation triggered by receptor tyrosine kinase signals [8].                                                                  |
| Tank binding kinase 1 (p-TBK1)                                    | Serine 172                     | TBK1 interacts with TNF receptor-associated factor 2 (TRAF2) and TRAF binding protein (TANK) to promote TNF $\alpha$ -induced NF- $\kappa$ B activation [9].                                                                                            |
| p38 mitogen activated kinase (p-38)                               | Threonine 180/<br>Tyrosine 182 | p38 is activated by dual phosphorylation at threonine 180 and tyrosine 182 in response to TNF $\alpha$ and other stress signals [10].                                                                                                                   |
| p90 ribosomal S6 kinase (p-RSK)                                   | Threonine 573                  | RSK is phosphorylated at threonine 573 by ERK in response to mitogenic stimulation [11]. CREB is a RSK substrate [12].                                                                                                                                  |
| cAMP response element-binding protein (p-CREB)                    | Serine 133                     | CREB is rapidly phosphorylated in response to TNF $\alpha$ treatment [13]. Serine 133 is a critical regulatory site that can be phosphorylated through p38 and ERK pathways [14].                                                                       |
| Jun subunit of activating protein-1 transcription factor (p-cJun) | Serine 73                      | c-Jun can be phosphorylated at serine 63 and 73 by JNK [15]. TNF $\alpha$ -induced serine 73 phosphorylation increases c-Jun transcriptional activity and expression level [16].                                                                        |
| MAP kinase activated protein kinase 2 (p-MK2)                     | Threonine 334                  | MK2 is activated by phosphorylations at threonine 334 and other residues after chemical stress [17].                                                                                                                                                    |
| Protein kinase B (p-AKT)                                          | Serine 473                     | AKT can be activated by TNF $\alpha$ [18], and may be required for TNF $\alpha$ -induced activation of NF- $\kappa$ B [18,19].                                                                                                                          |
| Glycogen synthase kinase 3 $\beta$ (p-GSK3 $\beta$ )              | Serine 9                       | GSK-3 $\beta$ is involved in both cell survival and death through the regulations of numerous factors, including NF- $\kappa$ B, $\beta$ Cat and CREB [20]. Inhibition of GSK-3 $\beta$ sensitizes hepatocytes to TNF $\alpha$ -induced apoptosis [21]. |
| Beta catenin (p- $\beta$ Cat)                                     | Serine 675                     | Phosphorylation of $\beta$ Cat at serine 675 by protein kinase A induces its nuclear accumulation and transcriptional activity [22]. $\beta$ Cat is negatively regulated by GSK-3 $\beta$ [23].                                                         |
| Heat shock protein 27 (p-HSP27)                                   | Serine 82                      | TNF $\alpha$ and interleukin-1 treatments can stimulate HSP27 phosphorylation [24].                                                                                                                                                                     |

## Supplementary Materials

**Table S2. TNF $\alpha$  sensitivity values of the eight cell lines.**

| Cell line                                 | EKVX   | HOP92  | A549   | H226   | H23    | H522   | HOP62  | H460  |
|-------------------------------------------|--------|--------|--------|--------|--------|--------|--------|-------|
| <b>TNF<math>\alpha</math> sensitivity</b> | 0.0314 | 0.1480 | 0.1600 | 0.1720 | 0.3720 | 0.4510 | 0.5320 | 1.000 |

**Table S3. Mutation status of the eight cell lines (from Ikediobi et. al., 2006).**

| Cell lines   | TP53                      | PTEN      | EGFR      |
|--------------|---------------------------|-----------|-----------|
| <b>EKVX</b>  | Mutated<br>c.609_610GG>TT | Wild type | Wild type |
| <b>HOP92</b> | Mutated c.524G>T          | Wild type | Wild type |
| <b>A549</b>  | Wild type                 | Wild type | Wild type |
| <b>H226</b>  | Inconclusive status       | Wild type | Wild type |
| <b>H23</b>   | Mutated c.738G>C          | Wild type | Wild type |
| <b>H522</b>  | Mutated c.572delC         | Wild type | Wild type |
| <b>HOP62</b> | Mutated c.G673-<br>2A>G   | Wild type | Wild type |
| <b>H460</b>  | Wild type                 | Wild type | Wild type |

## Supplementary Materials

### References for Table S3

1. Baeuerle PA, Baltimore D. NF-kappa B: ten years after. *Cell*. 1996;87: 13–20.
2. Beg AA, Baltimore D. An essential role for NF-kappaB in preventing TNF-alpha-induced cell death. *Science*. 1996;274: 782–784.
3. Wang CY, Mayo MW, Korneluk RG, Goeddel DV, Baldwin AS. NF-kappaB antiapoptosis: induction of TRAF1 and TRAF2 and c-IAP1 and c-IAP2 to suppress caspase-8 activation. *Science*. 1998;281: 1680–1683.
4. Kyriakis JM, Banerjee P, Nikolakaki E, Dai T, Rubie EA, Ahmad MF, et al. The stress-activated protein kinase subfamily of c-Jun kinases. *Nature*. 1994;369: 156–160. doi:10.1038/369156a0
5. Guo Y-L. Correlation between Sustained c-Jun N-terminal Protein Kinase Activation and Apoptosis Induced by Tumor Necrosis Factor-alpha in Rat Mesangial Cells. *J Biol Chem*. 1998;273: 4027–4034. doi:10.1074/jbc.273.7.4027
6. Ventura J-J, Cogswell P, Flavell RA, Baldwin ASJ, Davis RJ. JNK potentiates TNF-stimulated necrosis by increasing the production of cytotoxic reactive oxygen species. *Genes Dev*. 2004;18: 2905–2915. doi:10.1101/gad.1223004
7. Geng Y, Valbracht J, Lotz M. Selective activation of the mitogen-activated protein kinase subgroups c-Jun NH2 terminal kinase and p38 by IL-1 and TNF in human articular chondrocytes. *J Clin Invest*. 1996;98: 2425–2430.
8. Muller G, Storz P, Bourteele S, Doppler H, Pfizenmaier K, Mischak H, et al. Regulation of Raf-1 kinase by TNF via its second messenger ceramide and cross-talk with mitogenic signalling. *EMBO J*. 1998;17: 732–742. doi:10.1093/emboj/17.3.732
9. Pomerantz JL, Baltimore, David. NF-kappa B activation by a signaling complex containing TRAF2, TANK and TBK1, a novel IKK-related kinase. *EMBO J*. 1999;18: 6694–6704. doi:10.1093/emboj/18.23.6694
10. Raingeaud J, Gupta S, Rogers JS, Dickens M, Han J, Ulevitch RJ, et al. Pro-inflammatory Cytokines and Environmental Stress Cause p38 Mitogen-activated Protein Kinase Activation by Dual Phosphorylation on Tyrosine and Threonine. *J Biol Chem*. 1995;270: 7420–7426. doi:10.1074/jbc.270.13.7420
11. Roux PP, Richards SA, Blenis J. Phosphorylation of p90 Ribosomal S6 Kinase (RSK) Regulates Extracellular Signal-Regulated Kinase Docking and RSK Activity. *Mol Cell Biol*. 2003;23: 4796–4804. doi:10.1128/MCB.23.14.4796-4804.2003
12. Frödin M, Gammeltoft S. Role and regulation of 90 kDa ribosomal S6 kinase (RSK) in signal transduction. *Mol Cell Endocrinol*. 1999;151: 65–77. doi:10.1016/S0303-7207(99)00061-1
13. Deak M, Clifton AD, Lucocq LM, Alessi DR. Mitogen- and stress-activated protein kinase-1 (MSK1) is directly activated by MAPK and SAPK2/p38, and may mediate activation of CREB. *EMBO J*. 1998;17: 4426–4441. doi:10.1093/emboj/17.15.4426
14. Xing J, Kornhauser JM, Xia Z, Thiele EA, Greenberg ME. Nerve growth factor activates extracellular signal-regulated kinase and p38 mitogen-activated protein kinase pathways to stimulate CREB serine 133 phosphorylation. *Mol Cell Biol*. 1998;18: 1946–1955.
15. Dérjard B, Hibi M, Wu I-H, Barrett T, Su B, Deng T, et al. JNK1: A protein kinase stimulated by UV light and Ha-Ras that binds and phosphorylates the c-Jun activation domain. *Cell*. 1994;76: 1025–1037. doi:10.1016/0092-8674(94)90380-8

16. Liu J, Minemoto Y, Lin A. c-Jun N-Terminal Protein Kinase 1 (JNK1), but Not JNK2, Is Essential for Tumor Necrosis Factor Alpha-Induced c-Jun Kinase Activation and Apoptosis. *Mol Cell Biol.* 2004;24: 10844–10856. doi:10.1128/MCB.24.24.10844-10856.2004
17. Ben-Levy R, Leighton IA, Doza YN, Attwood P, Morrice N, Marshall CJ, et al. Identification of novel phosphorylation sites required for activation of MAPKAP kinase-2. *EMBO J.* 1995;14: 5920–5930.
18. Nidai Ozes O, Mayo LD, Gustin JA, Pfeffer SR, Pfeffer LM, Donner DB. NF- $\kappa$ B activation by tumour necrosis factor requires the Akt serine–threonine kinase. *Nature.* 1999;401: 82–85. doi:10.1038/43466
19. Hatano E, Brenner DA. Akt protects mouse hepatocytes from TNF- $\alpha$ - and Fas-mediated apoptosis through NK- $\kappa$ B activation. *Am J Physiol - Gastrointest Liver Physiol.* 2001;281: G1357–G1368.
20. Hoeflich KP, Luo J, Rubie EA, Tsao MS, Jin O, Woodgett JR. Requirement for glycogen synthase kinase-3 $\beta$  in cell survival and NF- $\kappa$ B activation. *Nature.* 2000;406: 86–90. doi:10.1038/35017574
21. Schwabe RF, Brenner DA. Role of glycogen synthase kinase-3 in TNF- $\alpha$ -induced NF- $\kappa$ B activation and apoptosis in hepatocytes. *Am J Physiol - Gastrointest Liver Physiol.* 2002;283: G204–G211. doi:10.1152/ajpgi.00016.2002
22. Taurin S, Sandbo N, Qin Y, Browning D, Dulin NO. Phosphorylation of  $\beta$ -Catenin by Cyclic AMP-dependent Protein Kinase. *J Biol Chem.* 2006;281: 9971–9976. doi:10.1074/jbc.M508778200
23. Yost C, Torres M, Miller JR, Huang E, Kimelman D, Moon RT. The axis-inducing activity, stability, and subcellular distribution of beta-catenin is regulated in *Xenopus* embryos by glycogen synthase kinase 3. *Genes Dev.* 1996;10: 1443–1454. doi:10.1101/gad.10.12.1443
24. Guesdon F, Freshney N, Waller RJ, Rawlinson L, Saklatvala J. Interleukin 1 and tumor necrosis factor stimulate two novel protein kinases that phosphorylate the heat shock protein hsp27 and beta-casein. *J Biol Chem.* 1993;268: 4236–4243.
